# Supplementary material for: Are Phthalate Exposure Related to Oxidative Stress in Children and Adolescents with Asthma? A Cumulative Risk Assessment Approach
Source: MDPI journal article supplement (doi:10.3390/antiox11071315), 2022-07-01
Supplement: s1 [file s1]

## Supplementary information

Missing data information in Table 1.

<sup>b</sup> Ten and 9 missing data of annual house income in control and case group, respectively.

<sup>c</sup> Six missing data of parents (at least one) have asthma or allergy in control group.

<sup>d</sup> Five and 1 missing data of mother smoked or was exposed to secondhand smoke during pregnancy in control and case group, respectively.

<sup>e</sup> Five missing data of children exposed to secondhand smoke in control group.

<sup>f</sup> Ten and 3 missing data of home within 1 km from the main road in control and case group, respectively.

<sup>g</sup> Three and 1 missing data of cockroaches exist at home in control and case group, respectively.

<sup>h</sup> Three missing data of have pets at home in control group.

<sup>i</sup> Five and 2 missing data of incense use at home in control and case group, respectively.

<sup>j</sup> Five and 3 missing data of pesticide use at home in control and case group, respectively.

<sup>k</sup> Four and 1 missing data of have home carpeted in control and case group, respectively.

<sup>l</sup> Five and 1 missing data of have an air conditioner at home in control and case group, respectively.

<sup>m</sup> Four and 2 missing data of have mold plaque (wall cancer or moss) on the walls or bathroom at home in control and case group, respectively.

<sup>n</sup> Nine and 12 missing data of have children take vitamin C or E in control and case group, respectively.

<sup>o</sup> Nine and 13 missing data of have children take cod liver oil in control and case group, respectively.

<sup>p</sup> Nine and 12 missing data of have children take deep sea fish oil in control and case group, respectively.

<sup>q</sup> Nine and 13 missing data of have children take vitamin D and calcium tablets in control and case group, respectively.

<sup>r</sup> Ten and 13 missing data of have children take lactic acid bacteria in control and case group, respectively.

<sup>s</sup> Nine and 12 missing data of have children take propolis in control and case group, respectively.

<sup>t</sup> Nine and 12 missing data of have children take traditional Chinese medicine (American ginseng) in control and case group, respectively.

Table S1. Comparison of different case-control ratio by propensity score matching

| case-control<br>ratio | 1:3<br>(case= 46,<br>control= 122)<br>matching:<br>sex, age,<br>BMI |       | 1:3<br>(case= 42,<br>control= 117)<br>matching:<br>sex, age,<br>BMI |       | 1:3<br>(case= 46,<br>control= 119)<br>matching:<br>sex, age |       | 1:3<br>(case= 41,<br>control= 111)<br>matching:<br>sex, age,<br>BMI |              |
|-----------------------|---------------------------------------------------------------------|-------|---------------------------------------------------------------------|-------|-------------------------------------------------------------|-------|---------------------------------------------------------------------|--------------|
|                       | SMD                                                                 | VR    | SMD                                                                 | VR    | SMD                                                         | VR    | SMD                                                                 | VR           |
| LPS                   | 0.110                                                               | 1.003 | 0.147                                                               | 1.329 | 0.109                                                       | 1.149 | <b>0.080</b>                                                        | <b>1.271</b> |
| Age                   | -0.009                                                              | 1.399 | 0.060                                                               | 3.047 | 0.099                                                       | 2.443 | <b>0.052</b>                                                        | 2.953        |
| Sex                   | 0.121                                                               | 0.876 | 0.163                                                               | 0.331 | 0.077                                                       | 0.902 | <b>-0.039</b>                                                       | <b>0.970</b> |
| BMI                   |                                                                     |       | 0.022                                                               | 0.973 |                                                             |       | <b>0.100</b>                                                        | <b>1.100</b> |

SMD= Standardized mean difference; VR= Variance ratio; LPS= logit of the propensity score

Criteria of proper matching:  $SMD < 0.1$ ,  $0.5 < VR < 2$

Table S2. Tolerable daily intake (TDI) of seven phthalates by EFSA and WHO

| <b>Parent phthalate<br/>Compounds</b> | <b>Endpoint</b>     | <b>TDI (µg/kg /day)</b> |
|---------------------------------------|---------------------|-------------------------|
| <b>DEP</b>                            | Organ weight        | 500                     |
| <b>DBP (i+n)</b>                      | Reproductive effect | 50                      |
| <b>DnBP</b>                           | Reproductive effect | 10                      |
| <b>DiBP</b>                           | Reproductive effect | 10                      |
| <b>BBzP</b>                           | Reproductive effect | 50                      |
| <b>DiNP</b>                           | Reproductive effect | 50                      |
| <b>DEHP</b>                           | Reproductive effect | 50                      |

Table S3. Levels of urinary phthalate metabolites (ng/mL) for control and case groups at different demographic factors.

| Control, median (interquartile rage)                                   | MMP                 | MEP                  | MiBP                 | MnBP                 |
|------------------------------------------------------------------------|---------------------|----------------------|----------------------|----------------------|
| Male                                                                   | 16.54 (5.43-35.56)  | 19.16 (6.16-55.75)   | 22.38 (8.67-90.36)   | 84.01 (12.81-225.12) |
| Female                                                                 | 10.77 (6.95-26.73)  | 18.57 (11.41-62.64)  | 16.66 (9.35-64.81)   | 22.33 (16.77-63.29)  |
| Annual House income < 18,750                                           | 6.48 (2.82-23.24)   | 14.78 (4.32-43.51)   | 16.16 (4.74-76.66)   | 21.78 (8.35-97.55)   |
| Annual House income 18,750-31,250                                      | 12.65 (6.95-33.02)  | 18.57 (8.98-58.63)   | 26.50 (8.57-102.79)  | 34.23 (15.40-149.71) |
| Annual House income > 31,250                                           | 17.90 (8.73-38.47)  | 26.10 (12.90-67.91)  | 22.40 (11.49-90.51)  | 39.32 (20.52-224.86) |
| Parents (at least one) have asthma or allergy, Yes                     | 11.07 (6.17-58.18)  | 20.30 (6.75-75.91)   | 18.49 (12.38-32.46)  | 88.89 (21.49-181.07) |
| Parents (at least one) have asthma or allergy, No                      | 14.68 (5.88-34.00)  | 19.16 (9.16-55.75)   | 22.09 (8.83-100.27)  | 30.93 (13.50-188.87) |
| Mother smoked or was exposed to secondhand smoke during pregnancy, Yes | 14.64 (5.36-49.40)  | 14.62 (4.54-28.20)   | 23.34 (8.63-99.82)   | 30.94 (10.78-146.65) |
| Mother smoked or was exposed to secondhand smoke during pregnancy, No  | 14.89 (6.61-33.50)  | 26.48 (12.12-62.94)  | 19.00 (9.06-88.39)   | 31.26 (17.70-234.99) |
| Children exposed to secondhand smoke, Yes                              | 14.00 (5.36-38.31)  | 17.64 (5.87-58.01)   | 22.32 (8.63-106.24)  | 30.94 (15.46-184.35) |
| Children exposed to secondhand smoke, No                               | 15.51 (7.80-29.68)  | 24.66 (12.15-65.67)  | 20.34 (9.41-68.85)   | 28.09 (16.57-184.51) |
| Home within 1 km from the main road, Yes                               | 11.71 (5.91-31.67)  | 20.10 (8.70-62.43)   | 21.29 (8.64-91.38)   | 30.93 (15.60-200.59) |
| Home within 1 km from the main road, No                                | 23.15 (15.31-40.29) | 17.90 (11.43-56.15)  | 33.29 (12.71-107.39) | 63.29 (21.60-164.67) |
| Cockroaches exist at home, Yes                                         | 13.97 (5.87-29.79)  | 17.90 (6.34-50.18)   | 17.92 (8.57-64.81)   | 25.62 (11.86-146.32) |
| Cockroaches exist at home, No                                          | 29.39 (6.55-47.34)  | 43.51 (20.21-115.85) | 76.66 (17.22-305.70) | 89.55 (28.00-310.54) |
| Have pets at home, Yes                                                 | 12.09 (7.02-23.36)  | 11.19 (5.78-23.91)   | 16.53 (8.55-24.12)   | 23.84 (16.43-51.71)  |
| Have pets at home, No                                                  | 16.09 (5.98-37.31)  | 24.01 (11.43-63.94)  | 22.61 (9.51-95.24)   | 50.40 (16.85-227.12) |
| Incense use at home, Yes                                               | 8.77 (4.84-23.19)   | 16.16 (7.11-48.42)   | 15.03 (8.69-33.37)   | 24.34 (14.97-94.61)  |
| Incense use at home, No                                                | 23.91 (6.95-40.81)  | 26.10 (13.16-80.68)  | 31.63 (16.14-251.68) | 97.55 (20.13-297.30) |

Table S3. (continued)

| Control, median (interquartile rage)                                         | MMP                 | MEP                  | MiBP                  | MnBP                  |
|------------------------------------------------------------------------------|---------------------|----------------------|-----------------------|-----------------------|
| Pesticide use at home, Yes                                                   | 16.25 (6.44-43.61)  | 18.57 (7.09-60.64)   | 22.82 (9.26-105.09)   | 30.61 (17.01-211.62)  |
| Pesticide use at home, No                                                    | 15.31 (6.08-32.36)  | 19.90 (9.38-48.42)   | 21.82 (9.05-82.48)    | 31.28 (15.53-181.95)  |
| Have home carpeted, Yes                                                      | 11.10 (2.56-26.61)  | 9.38 (1.11-28.78)    | 15.05 (6.34-22.04)    | 31.94 (5.98-118.61)   |
| Have home carpeted, No                                                       | 15.92 (6.65-36.41)  | 21.88 (11.41-62.36)  | 22.40 (9.50-102.79)   | 31.28 (17.72-224.34)  |
| Have mold plaque (wall cancer or moss) on the walls or bathroom at home, Yes | 11.67 (6.48-38.19)  | 19.44 (9.09-46.65)   | 19.51 (9.50-80.96)    | 37.51 (18.48-149.71)  |
| Have mold plaque (wall cancer or moss) on the walls or bathroom at home, No  | 15.82 (6.04-34.45)  | 19.39 (8.25-61.43)   | 22.38 (9.22-92.28)    | 29.97 (15.46-216.43)  |
| Have children take vitamin C or E, Yes                                       | 15.51 (6.53-34.75)  | 18.76 (11.57-33.24)  | 22.38 (11.14-99.82)   | 35.13 (17.40-180.61)  |
| Have children take vitamin C or E, No                                        | 13.33 (5.98-32.15)  | 25.71 (6.28-66.15)   | 22.32 (9.06-89.68)    | 30.94 (15.38-193.83)  |
| Have children take cod liver oil, Yes                                        | 15.76 (5.01-27.83)  | 20.02 (7.20-51.43)   | 13.20 (9.39-52.65)    | 23.69 (16.95-206.54)  |
| Have children take cod liver oil, No                                         | 14.68 (6.12-35.45)  | 20.10 (9.29-59.56)   | 22.94 (9.33-95.24)    | 32.76 (16.50-180.81)  |
| Have children take deep sea fish oil, Yes                                    | 23.15 (17.83-37.60) | 40.01 (17.72-111.19) | 131.72 (16.25-187.92) | 146.32 (28.45-271.67) |
| Have children take deep sea fish oil, No                                     | 13.97 (5.90-30.50)  | 19.90 (9.03-57.20)   | 21.82 (8.95-88.48)    | 31.24 (14.97-174.34)  |
| Have children take vitamin D and calcium tablets, Yes                        | 16.71 (6.36-42.33)  | 19.67 (14.19-59.27)  | 22.61 (11.49-169.79)  | 59.08 (21.63-227.12)  |
| Have children take vitamin D and calcium tablets, No                         | 12.20 (5.98-26.36)  | 22.29 (5.87-58.01)   | 19.95 (8.10-80.57)    | 29.97 (13.50-163.27)  |
| Have children take lactic acid bacteria, Yes                                 | 16.25 (7.64-38.74)  | 20.30 (11.91-62.36)  | 21.82 (10.11-88.30)   | 39.32 (19.28-225.38)  |
| Have children take lactic acid bacteria, No                                  | 10.64 (5.60-25.03)  | 20.38 (4.99-58.34)   | 22.94 (6.69-140.05)   | 29.97 (10.52-114.06)  |
| Have children take propolis, Yes                                             | 13.79 (7.78-33.03)  | 32.91 (4.94-81.15)   | 28.09 (18.94-68.24)   | 91.59 (33.47-102.81)  |
| Have children take propolis, No                                              | 14.68 (5.98-32.15)  | 20.10 (9.29-58.34)   | 22.09 (9.30-95.24)    | 31.26 (16.43-224.60)  |
| Have children take traditional Chinese medicine (American ginseng), Yes      | 10.21 (5.61-50.46)  | 20.30 (9.83-50.61)   | 24.11 (8.52-95.54)    | 31.27 (14.97-228.85)  |
| Have children take traditional Chinese medicine (American ginseng), No       | 15.72 (6.30-29.65)  | 19.90 (8.43-60.50)   | 22.37 (9.53-91.83)    | 31.28 (17.25-167.95)  |

Table S3. (continued)

| Control, median (interquartile rage)                                   | MBzP           | MiNP             | ΣDBPm            | ΣDEHPm           |
|------------------------------------------------------------------------|----------------|------------------|------------------|------------------|
| Male                                                                   | 2.46 (ND-7.00) | 1.17 (ND-55.28)  | 0.45 (0.10-1.59) | 0.81 (0.26-2.63) |
| Female                                                                 | 2.60 (ND-4.45) | 2.13 (ND-67.57)  | 0.17 (0.12-0.80) | 0.84 (0.21-2.26) |
| Annual House income < 18,750                                           | ND (ND-2.52)   | 6.76 (ND-299.04) | 0.17 (0.06-0.93) | 0.64 (0.14-1.33) |
| Annual House income 18,750-31,250                                      | 2.36 (ND-6.21) | 2.23 (ND-17.10)  | 0.27 (0.10-1.60) | 1.04 (0.25-2.94) |
| Annual House income > 31,250                                           | 3.83 (ND-8.27) | ND (ND-238.13)   | 0.43 (0.15-1.37) | 0.89 (0.33-2.96) |
| Parents (at least one) have asthma or allergy, Yes                     | 2.25 (ND-3.65) | ND (ND-152.07)   | 0.43 (0.17-0.92) | 0.59 (0.32-3.43) |
| Parents (at least one) have asthma or allergy, No                      | 2.46 (ND-7.00) | 3.50 (ND-67.11)  | 0.25 (0.10-1.29) | 0.83 (0.24-2.27) |
| Mother smoked or was exposed to secondhand smoke during pregnancy, Yes | 2.31 (ND-6.58) | 1.12 (ND-16.39)  | 0.27 (0.09-0.99) | 0.97 (0.21-3.09) |
| Mother smoked or was exposed to secondhand smoke during pregnancy, No  | 3.36 (ND-7.81) | 1.17 (ND-121.24) | 0.25 (0.12-1.43) | 0.79 (0.26-2.26) |
| Children exposed to secondhand smoke, Yes                              | 2.36 (ND-6.75) | 2.43 (ND-22.21)  | 0.27 (0.11-1.12) | 0.93 (0.19-3.09) |
| Children exposed to secondhand smoke, No                               | 3.54 (ND-7.81) | ND (ND-121.24)   | 0.33 (0.11-1.17) | 0.79 (0.36-1.88) |
| Home within 1 km from the main road, Yes                               | 2.41 (ND-7.12) | ND (ND-66.18)    | 0.25 (0.10-1.35) | 0.71 (0.21-2.39) |
| Home within 1 km from the main road, No                                | 3.26 (ND-8.79) | ND (ND-8.43)     | 0.43 (0.17-1.08) | 2.24 (0.97-3.61) |
| Cockroaches exist at home, Yes                                         | 2.45 (ND-6.46) | 3.02 (ND-84.45)  | 0.21 (0.09-0.98) | 0.72 (0.21-2.26) |
| Cockroaches exist at home, No                                          | 3.83 (ND-9.37) | ND (ND-10.18)    | 0.96 (0.24-2.99) | 1.51 (0.74-3.85) |
| Have pets at home, Yes                                                 | 2.42 (ND-6.46) | ND (ND-3.12)     | 0.19 (0.13-0.60) | 0.46 (0.19-1.93) |
| Have pets at home, No                                                  | 2.61 (ND-7.12) | 4.02 (ND-109.47) | 0.45 (0.12-1.35) | 0.88 (0.29-2.72) |
| Incense use at home, Yes                                               | 2.36 (ND-4.23) | ND (ND-14.11)    | 0.17 (0.10-0.73) | 0.76 (0.26-1.48) |
| Incense use at home, No                                                | 4.08 (ND-8.29) | 8.33 (ND-92.62)  | 0.80 (0.17-2.51) | 1.09 (0.29-3.15) |

Table S3. (continued)

| Control, median (interquartile rage)                                         | MBzP              | MiNP             | ΣDBPm            | ΣDEHPm           |
|------------------------------------------------------------------------------|-------------------|------------------|------------------|------------------|
| Pesticide use at home, Yes                                                   | 2.62 (ND-7.98)    | ND (ND-14.98)    | 0.27 (0.13-1.24) | 0.92 (0.27-2.88) |
| Pesticide use at home, No                                                    | 2.60 (ND-6.15)    | 2.23 (ND-92.62)  | 0.27 (0.11-1.26) | 0.80 (0.25-2.47) |
| Have home carpeted, Yes                                                      | 1.26 (ND-3.59)    | ND (ND-11.40)    | 0.23 (0.04-0.60) | 0.59 (0.24-1.19) |
| Have home carpeted, No                                                       | 2.97 (ND-7.33)    | 2.23 (ND-67.57)  | 0.27 (0.14-1.39) | 0.87 (0.27-2.94) |
| Have mold plaque (wall cancer or moss) on the walls or bathroom at home, Yes | 2.36 (ND-4.28)    | ND (ND-23.98)    | 0.28 (0.16-1.08) | 0.64 (0.27-1.28) |
| Have mold plaque (wall cancer or moss) on the walls or bathroom at home, No  | 2.99 (ND-8.67)    | 2.43 (ND-106.08) | 0.26 (0.10-1.38) | 1.04 (0.26-2.90) |
| Have children take vitamin C or E, Yes                                       | 2.72 (ND-6.02)    | ND (ND-22.28)    | 0.37 (0.15-1.29) | 1.01 (0.27-2.90) |
| Have children take vitamin C or E, No                                        | 2.58 (ND-7.97)    | 2.43 (ND-71.79)  | 0.27 (0.10-1.16) | 0.81 (0.27-1.68) |
| Have children take cod liver oil, Yes                                        | 9.78 (3.10-22.73) | ND (ND-8.37)     | 0.17(0.11-1.16)  | 1.54 (0.57-2.78) |
| Have children take cod liver oil, No                                         | 2.56 (ND-6.56)    | 2.43 (ND-66.18)  | 0.28 (0.12-1.20) | 0.86 (0.27-2.27) |
| Have children take deep sea fish oil, Yes                                    | 3.29 (2.80-5.36)  | 2.13 (ND-264.88) | 1.64 (0.46-1.83) | 1.24 (0.96-2.93) |
| Have children take deep sea fish oil, No                                     | 2.52 (ND-7.19)    | ND (ND-44.85)    | 0.26 (0.10-1.10) | 0.79 (0.26-2.48) |
| Have children take vitamin D and calcium tablets, Yes                        | 2.99 (ND-7.88)    | ND (ND-23.74)    | 0.49 (0.16-1.65) | 1.05 (0.31-3.07) |
| Have children take vitamin D and calcium tablets, No                         | 2.55 (ND-6.18)    | 2.43 (ND-79.77)  | 0.27 (0.09-0.95) | 0.79 (0.26-1.95) |
| Have children take lactic acid bacteria, Yes                                 | 3.26 (ND-6.84)    | 2.23 (ND-65.72)  | 0.28 (0.14-1.34) | 0.89 (0.32-2.69) |
| Have children take lactic acid bacteria, No                                  | 2.11 (ND-7.28)    | ND (ND-86.79)    | 0.27 (0.09-1.09) | 0.83 (0.21-2.10) |
| Have children take propolis, Yes                                             | 4.19 (1.10-16.28) | ND (ND-3.36)     | 0.63 (0.25-0.92) | 1.90 (0.42-2.86) |
| Have children take propolis, No                                              | 2.55 (ND-6.89)    | 2.18 (ND-71.79)  | 0.27 (0.11-1.43) | 0.83 (0.27-2.29) |
| Have children take traditional Chinese medicine (American ginseng), Yes      | 3.24 (ND-6.95)    | ND (ND-14.79)    | 0.24 (0.11-1.52) | 0.92 (0.31-2.81) |
| Have children take traditional Chinese medicine (American ginseng), No       | 2.37 (ND-7.10)    | 2.23 (ND-92.62)  | 0.27 (0.14-1.10) | 0.84 (0.26-2.27) |

Table S3. (continued)

| Case, median (interquartile range)                                     | MMP                | MEP                 | MiBP                 | MnBP                  |
|------------------------------------------------------------------------|--------------------|---------------------|----------------------|-----------------------|
| Male                                                                   | 15.70 (7.51-33.42) | 21.35 (8.46-49.44)  | 20.41 (12.87-44.07)  | 32.65 (19.36-160.65)  |
| Female                                                                 | 5.86 (3.91-20.07)  | 14.45 (7.43-37.71)  | 22.70 (10.37-195.40) | 35.25 (11.10-345.21)  |
| Annual House income < 18,750                                           | 20.28 (7.25-27.42) | 16.00 (9.57-33.03)  | 20.41 (18.50-42.60)  | 34.81 (23.04-164.86)  |
| Annual House income 18,750-31,250                                      | 8.76 (2.16-14.94)  | 27.91 (9.70-47.14)  | 15.58 (13.19-19.55)  | 14.61 (12.18-21.32)   |
| Annual House income > 31,250                                           | 13.61 (5.54-24.91) | 13.22 (6.05-33.14)  | 16.16 (8.64-101.22)  | 35.69 (10.32-90.50)   |
| Parents (at least one) have asthma or allergy, Yes                     | 14.96 (7.03-24.19) | 10.10 (4.57-36.55)  | 18.84 (12.87-163.66) | 25.70 (22.66-423.64)  |
| Parents (at least one) have asthma or allergy, No                      | 15.66 (4.74-31.95) | 20.08 (9.07-52.71)  | 23.46 (10.70-85.67)  | 35.25 (15.44-176.72)  |
| Mother smoked or was exposed to secondhand smoke during pregnancy, Yes | 15.53 (5.00-24.68) | 11.58 (3.88-56.93)  | 18.50 (8.52-65.17)   | 27.07 (9.10-180.47)   |
| Mother smoked or was exposed to secondhand smoke during pregnancy, No  | 17.07 (4.50-34.06) | 24.80 (13.04-39.52) | 30.06 (18.17-110.95) | 37.24 (24.89-141.35)  |
| Children exposed to secondhand smoke, Yes                              | 15.66 (4.72-28.17) | 17.40 (4.57-58.85)  | 19.99 (9.31-99.80)   | 32.59 (11.57-183.77)  |
| Children exposed to secondhand smoke, No                               | 15.43 (9.11-31.38) | 21.35 (11.03-35.76) | 29.84 (17.40-32.36)  | 36.45 (22.07-130.46)  |
| Home within 1 km from the main road, Yes                               | 15.66 (5.44-29.94) | 23.06 (8.84-62.64)  | 19.99 (11.43-97.22)  | 33.73 (15.64-155.77)  |
| Home within 1 km from the main road, No                                | 9.78 (4.59-18.33)  | 16.45 (5.36-34.12)  | 27.83 (17.05-184.16) | 235.72 (49.66-383.89) |
| Cockroaches exist at home, Yes                                         | 14.96 (4.61-24.91) | 16.00 (7.88-35.70)  | 19.98 (11.48-31.33)  | 30.36 (17.03-170.42)  |
| Cockroaches exist at home, No                                          | 23.72 (3.98-36.55) | 18.81 (7.92-64.31)  | 31.50 (10.84-217.95) | 34.81 (10.88-235.89)  |
| Have pets at home, Yes                                                 | 15.43 (5.14-19.46) | 31.33 (16.00-34.72) | 19.98 (18.36-101.22) | 131.67 (17.03-170.42) |
| Have pets at home, No                                                  | 19.56 (4.60-33.19) | 13.15 (5.81-56.93)  | 23.46 (11.43-65.17)  | 33.73 (15.18-185.44)  |
| Incense use at home, Yes                                               | 14.52 (4.25-20.07) | 20.08 (9.13-35.45)  | 19.41 (15.55-31.20)  | 25.99 (16.07-121.37)  |
| Incense use at home, No                                                | 23.72 (9.89-28.93) | 13.09 (9.04-71.11)  | 25.39 (11.48-101.10) | 38.04 (23.63-205.28)  |



Table S3. (continued)

| Case, median (interquartile rage)                                            | MMP                 | MEP                 | MiBP                 | MnBP                  |
|------------------------------------------------------------------------------|---------------------|---------------------|----------------------|-----------------------|
| Pesticide use at home, Yes                                                   | 14.53 (4.84-19.13)  | 18.67 (8.80-32.69)  | 19.32 (14.58-48.76)  | 63.09 (16.07-176.72)  |
| Pesticide use at home, No                                                    | 23.57 (4.97-29.94)  | 26.77 (8.29-73.34)  | 23.72 (10.52-110.86) | 31.51 (20.11-154.63)  |
| Have home carpeted, Yes                                                      | 4.18 (3.50-67.86)   | 34.72 (23.81-52.92) | 19.98 (17.75-60.54)  | 25.70 (19.59-124.62)  |
| Have home carpeted, No                                                       | 15.62 (5.14-28.89)  | 16.00 (6.05-42.92)  | 20.41 (11.31-95.92)  | 34.81 (15.75-170.42)  |
| Have mold plaque (wall cancer or moss) on the walls or bathroom at home, Yes | 12.79 (4.06-25.00)  | 18.67 (8.05-62.64)  | 19.99 (15.60-97.22)  | 24.74 (15.18-75.14)   |
| Have mold plaque (wall cancer or moss) on the walls or bathroom at home, No  | 15.43 (5.65-30.95)  | 13.22 (6.97-40.65)  | 20.41 (8.62-66.36)   | 36.45 (16.18-160.65)  |
| Have children take vitamin C or E, Yes                                       | 13.61 (2.83-24.91)  | 16.00 (11.62-34.72) | 20.00 (18.84-29.84)  | 30.36 (21.70-185.42)  |
| Have children take vitamin C or E, No                                        | 17.58 (8.80-29.91)  | 22.87 (9.13-39.52)  | 25.90 (13.57-97.25)  | 36.07 (20.77-141.35)  |
| Have children take cod liver oil, Yes                                        | 11.75 (5.61-21.60)  | 20.10 (11.94-28.01) | 22.94 (16.64-28.86)  | 28.03 (16.53-75.46)   |
| Have children take cod liver oil, No                                         | 19.87 (4.84-31.95)  | 20.08 (9.07-41.79)  | 25.90 (14.74-130.41) | 37.24 (22.77-181.67)  |
| Have children take deep sea fish oil, Yes                                    | 25.09 (24.68-25.50) | 19.47 (15.54-23.39) | 40.41 (33.16-47.66)  | 104.59 (67.48-141.71) |
| Have children take deep sea fish oil, No                                     | 14.96 (4.55-26.90)  | 21.35 (9.10-40.65)  | 20.41 (14.90-98.57)  | 35.69 (18.72-151.04)  |
| Have children take vitamin D and calcium tablets, Yes                        | 14.28 (5.28-25.16)  | 20.73 (3.88-45.63)  | 22.94 (10.88-106.98) | 32.59 (20.57-100.70)  |
| Have children take vitamin D and calcium tablets, No                         | 19.87 (4.22-29.91)  | 20.08 (11.96-34.45) | 25.90 (18.17-66.49)  | 38.21 (22.25-180.47)  |
| Have children take lactic acid bacteria, Yes                                 | 17.21 (7.56-24.61)  | 33.93 (13.91-66.16) | 27.87 (15.69-130.41) | 63.09 (27.29-181.67)  |
| Have children take lactic acid bacteria, No                                  | 19.05 (3.27-31.95)  | 12.99 (6.06-23.64)  | 20.97 (15.69-32.75)  | 30.12 (15.53-108.34)  |
| Have children take propolis, Yes                                             | 3.06 (1.61-19.53)   | 85.96 (45.51-90.11) | 18.84 (13.49-85.64)  | 21.70 (18.51-113.49)  |
| Have children take propolis, No                                              | 17.58 (6.63-25.66)  | 20.08 (9.78-35.45)  | 23.72 (15.55-85.67)  | 36.07 (22.77-160.73)  |
| Have children take traditional Chinese medicine (American ginseng), Yes      | 20.28 (4.18-25.91)  | 16.00 (12.89-34.72) | 20.00 (18.84-31.33)  | 30.36 (25.70-38.04)   |
| Have children take traditional Chinese medicine (American ginseng), No       | 15.33 (5.31-25.90)  | 24.33 (7.80-43.74)  | 25.68 (13.57-143.21) | 37.42 (15.64-172.52)  |

Table S3. (continued)

| Case, median (interquartile range)                                     | MBzP              | MiNP            | ΣDBPm            | ΣDEHPm           |
|------------------------------------------------------------------------|-------------------|-----------------|------------------|------------------|
| Male                                                                   | 4.79 (ND-10.97)   | ND (ND-15.88)   | 0.25 (0.16-1.14) | 0.79 (0.24-2.08) |
| Female                                                                 | 2.04 (ND-14.03)   | ND (ND-2.66)    | 0.76 (0.09-1.73) | 0.82 (0.20-1.19) |
| Annual House income < 18,750                                           | 5.59 (ND-14.34)   | ND (ND-15.83)   | 0.26 (0.19-0.99) | 1.08 (0.39-1.80) |
| Annual House income 18,750-31,250                                      | ND (ND-0.70)      | ND (ND-25.94)   | 0.14 (0.11-0.18) | 0.23 (0.15-0.40) |
| Annual House income > 31,250                                           | 2.04 (ND-8.71)    | ND (ND-2.65)    | 0.25 (0.08-1.19) | 0.78 (0.41-1.74) |
| Parents (at least one) have asthma or allergy, Yes                     | 3.44 (ND-5.80)    | ND (ND-17.60)   | 0.21 (0.17-2.85) | 0.69 (0.35-1.36) |
| Parents (at least one) have asthma or allergy, No                      | 4.51 (ND-12.01)   | ND (ND-14.67)   | 0.27 (0.13-1.21) | 0.85 (0.20-1.80) |
| Mother smoked or was exposed to secondhand smoke during pregnancy, Yes | 3.15 (ND-7.87)    | 1.81 (ND-16.06) | 0.23 (0.08-1.09) | 0.80 (0.16-1.47) |
| Mother smoked or was exposed to secondhand smoke during pregnancy, No  | 6.20 (ND-16.82)   | ND (ND-8.70)    | 0.27 (0.20-1.29) | 0.78 (0.48-2.51) |
| Children exposed to secondhand smoke, Yes                              | 3.69 (ND-8.31)    | 1.81 (ND-16.25) | 0.42 (0.08-1.39) | 1.00 (0.18-1.73) |
| Children exposed to secondhand smoke, No                               | 5.59 (1.09-17.42) | ND (ND-5.32)    | 0.26 (0.17-0.88) | 0.78 (0.46-2.35) |
| Home within 1 km from the main road, Yes                               | 3.40 (ND-13.24)   | ND (ND-16.06)   | 0.25 (0.14-1.09) | 0.74 (0.19-1.76) |
| Home within 1 km from the main road, No                                | 4.52 (0.97-9.38)  | ND (ND-5.00)    | 1.28 (0.34-2.42) | 1.14 (0.86-1.44) |
| Cockroaches exist at home, Yes                                         | 2.85 (ND-7.65)    | ND (ND-15.69)   | 0.25 (0.16-1.05) | 0.78 (0.28-1.45) |
| Cockroaches exist at home, No                                          | 10.64 (ND-21.60)  | ND (ND-11.64)   | 0.29 (0.10-2.04) | 1.19 (0.13-2.58) |
| Have pets at home, Yes                                                 | 8.71 (ND-16.44)   | ND (ND-ND)      | 0.76 (0.16-1.22) | 0.28 (0.16-1.19) |
| Have pets at home, No                                                  | 3.69 (ND-9.06)    | 1.38 (ND-15.84) | 0.25 (0.14-1.22) | 0.85 (0.38-1.80) |
| Incense use at home, Yes                                               | 3.40 (ND-15.23)   | ND (ND-10.09)   | 0.22 (0.15-0.88) | 0.53 (0.18-1.05) |
| Incense use at home, No                                                | 4.79 (ND-8.71)    | ND (ND-15.69)   | 0.31 (0.16-1.46) | 1.43 (0.69-2.97) |

Table S3. (continued)

| Case, median (interquartile rage)                                            | MBzP              | MiNP              | ΣDBPm            | ΣDEHPm           |
|------------------------------------------------------------------------------|-------------------|-------------------|------------------|------------------|
| Pesticide use at home, Yes                                                   | 3.15 (ND-8.02)    | 1.38 (ND-10.09)   | 0.60 (0.15-1.15) | 0.78 (0.20-1.49) |
| Pesticide use at home, No                                                    | 4.94 (ND-13.81)   | ND (ND-15.72)     | 0.25 (0.14-1.47) | 0.83 (0.36-1.94) |
| Have home carpeted, Yes                                                      | ND (ND-68.43)     | ND (ND-8.04)      | 0.21 (0.17-0.83) | 0.20 (0.19-3.53) |
| Have home carpeted, No                                                       | 3.94 (ND-10.64)   | ND (ND-15.69)     | 0.26 (0.14-1.19) | 0.79 (0.28-1.74) |
| Have mold plaque (wall cancer or moss) on the walls or bathroom at home, Yes | 2.04 (ND-7.23)    | 1.81 (ND-16.59)   | 0.22 (0.14-0.99) | 0.46 (0.19-1.52) |
| Have mold plaque (wall cancer or moss) on the walls or bathroom at home, No  | 4.79 (ND-14.24)   | ND (ND-11.84)     | 0.29 (0.13-1.36) | 1.08 (0.43-1.63) |
| Have children take vitamin C or E, Yes                                       | 5.92 (ND-16.23)   | ND (ND-15.69)     | 0.25 (0.18-0.92) | 0.50 (0.20-1.43) |
| Have children take vitamin C or E, No                                        | 3.69 (ND-9.36)    | ND (ND-8.70)      | 0.28 (0.15-1.20) | 0.99 (0.38-1.94) |
| Have children take cod liver oil, Yes                                        | ND (ND-5.78)      | ND (ND-2.02)      | 0.23 (0.15-0.47) | 0.56 (0.18-1.53) |
| Have children take cod liver oil, No                                         | 5.34 (0.62-12.01) | ND (ND-10.09)     | 0.45 (0.19-1.28) | 0.99 (0.43-2.22) |
| Have children take deep sea fish oil, Yes                                    | 3.90 (2.03-5.78)  | 7.90 (4.00-11.79) | 0.65 (0.45-0.85) | 1.36 (1.14-1.58) |
| Have children take deep sea fish oil, No                                     | 3.94 (ND-11.77)   | ND (ND-9.39)      | 0.26 (0.15-1.21) | 0.78 (0.24-1.77) |
| Have children take vitamin D and calcium tablets, Yes                        | 3.69 (ND-9.79)    | ND (ND-9.92)      | 0.40 (0.14-0.79) | 0.85 (0.19-1.57) |
| Have children take vitamin D and calcium tablets, No                         | 5.34 (ND-11.54)   | ND (ND-2.78)      | 0.28 (0.20-1.24) | 0.99 (0.37-2.51) |
| Have children take lactic acid bacteria, Yes                                 | 6.78 (2.39-16.39) | ND (ND-2.02)      | 0.62 (0.22-1.21) | 1.05 (0.35-1.69) |
| Have children take lactic acid bacteria, No                                  | 1.25 (ND-7.80)    | ND (ND-11.42)     | 0.24 (0.14-0.87) | 0.76 (0.23-2.22) |
| Have children take propolis, Yes                                             | ND (ND-3.03)      | ND (ND-150.11)    | 0.18 (0.14-0.90) | 0.50 (0.33-0.96) |
| Have children take propolis, No                                              | 4.51 (ND-12.01)   | ND (ND-10.09)     | 0.28 (0.17-1.15) | 0.85 (0.28-1.80) |
| Have children take traditional Chinese medicine (American ginseng), Yes      | 2.35 (ND-11.30)   | ND (ND-ND)        | 0.25 (0.18-0.59) | 0.74 (0.28-0.92) |
| Have children take traditional Chinese medicine (American ginseng), No       | 4.51 (ND-9.60)    | ND (ND-12.81)     | 0.40 (0.13-1.29) | 1.31 (0.26-1.94) |

Abbreviation: not detectable (ND).

Yellow color: comparison of different demographic factor by Wilcoxon signed-rank test or Kruskal-Wallis test and the groups' medians are significantly from each other,  $p < 0.05$ .

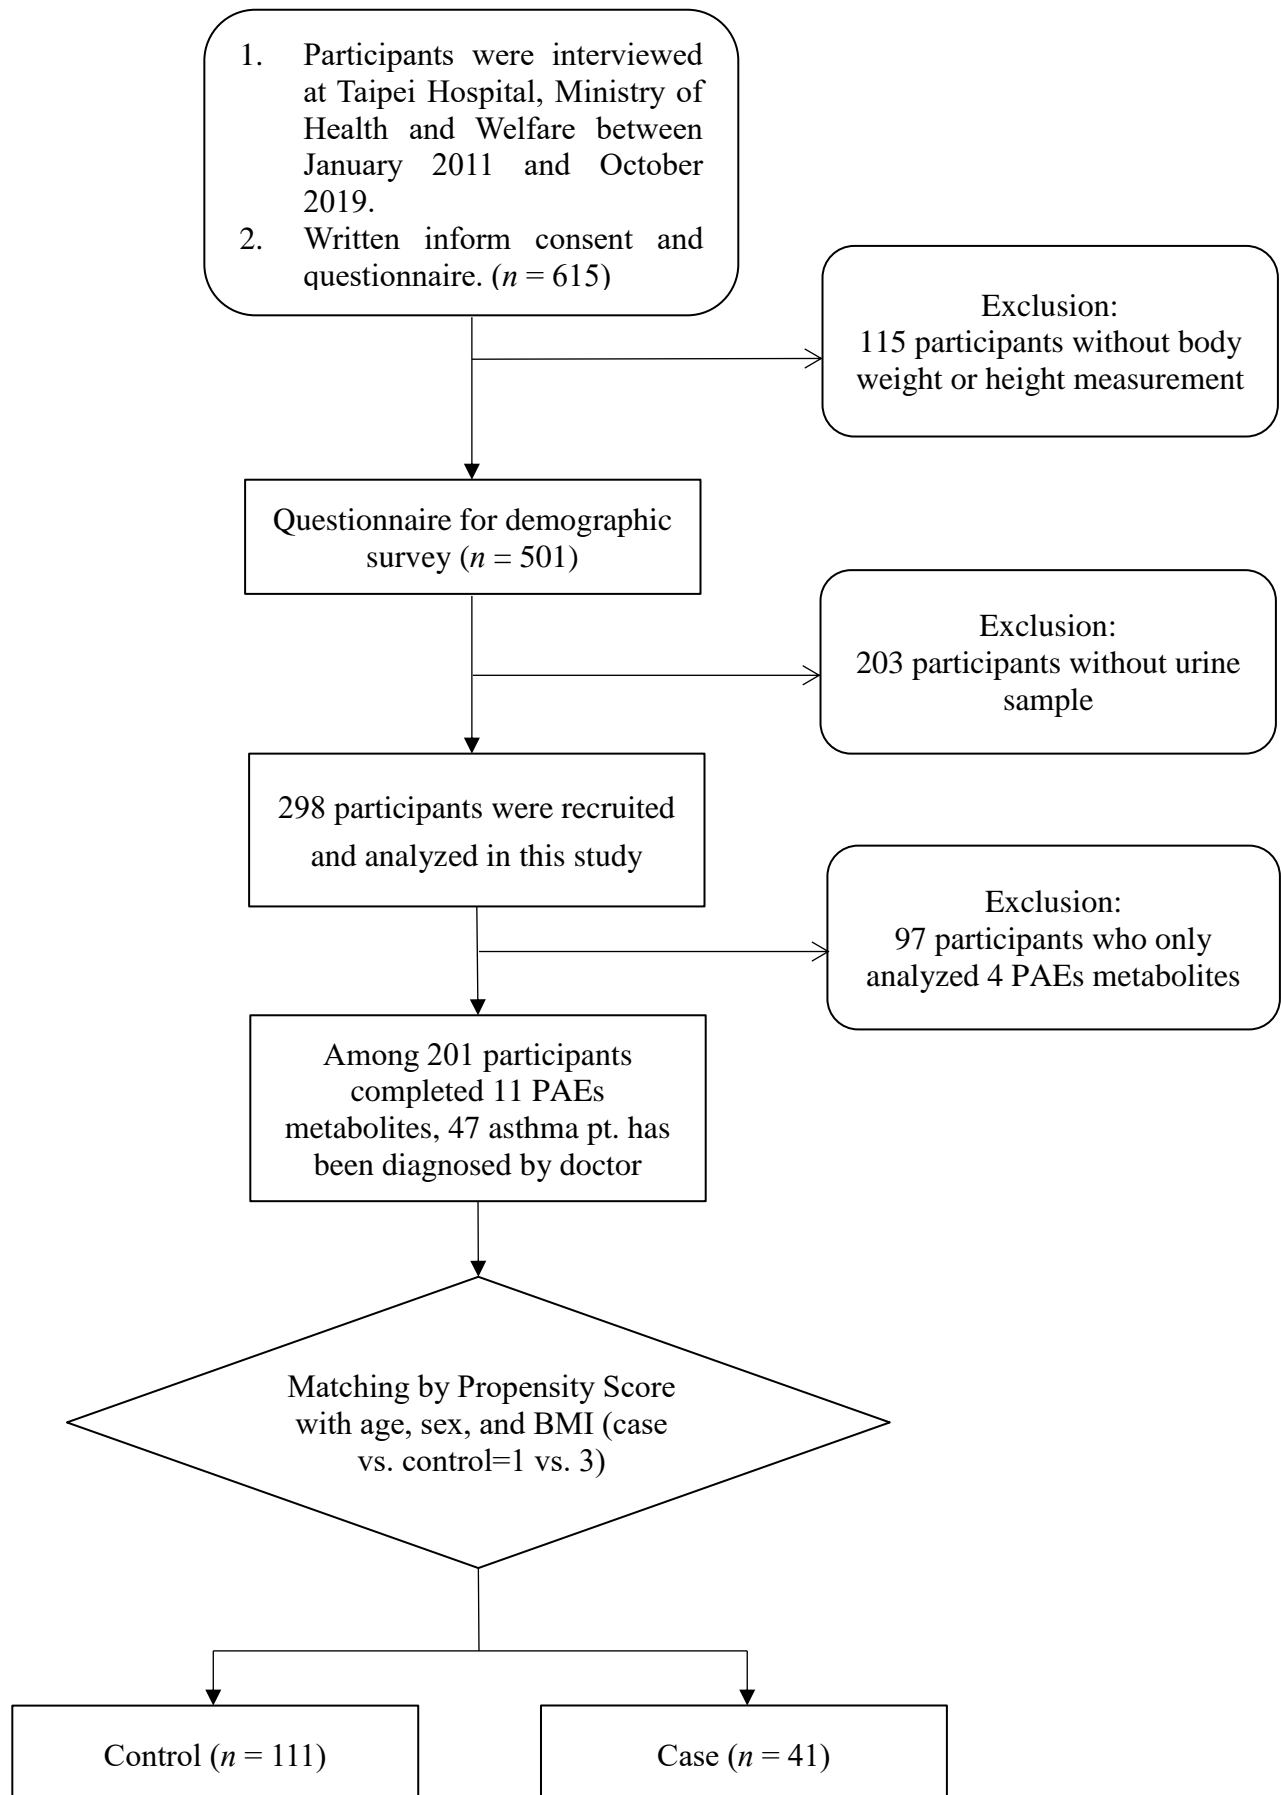

**Figure S1.** Flow chart of the recruitment of the study
